# Supplementary material for: Bilayer-Dependent Recognition of Docosahexaenoic Acid by the Transmembrane Domain of FATP3
Source: Research Square preprint supplement (doi:10.21203/rs.3.rs-6860198/v1), 2025-06-13
Supplement: Supplementary file 1 [file fff14dbccf8ac96b9d625234.docx]

**Materials and Methods**

**Materials**

*E. coli* DH5α and BL21 (DE3) competent cells were purchased from Beijing Biomed Gene Technology Co., Ltd.. The pMM-LR6 vector was kindly provided by Professor Blacklow SC from Harvard Medical School. Kanamycin and trifluoroacetic acid (TFA) were supplied by Shanghai Macklin Biochemical Technology Co., Ltd., and isopropyl-β-Dthiogalactoside (IPTG) by BioFroxx. Ni-NTA resin (L00666) was obtained from GenScript Biotech Corporation. Cyanogen bromide was sourced from Shanghai Aladdin Biochemical Technology Co., Ltd.. Chromatography-grade acetonitrile and isopropanol were from Beijing Merida Technology Co., Ltd.. 15NH4Cl and D2O were purchased from Cambridge Isotope Laboratories. Phospholipids 1,2-dimyristoyl-sn-glycero-3-phosphocholine (DMPC) and 1,2-dihexanoyl-sn-glycero-3-phosphocholine (DHPC) were supplied by Avanti Polar Lipids, and Fos-choline-14 (Fos-14) by Anatrace. All other reagents were of analytical grade and obtained from local sources unless otherwise specified.

**Construction of recombinant plasmid**

The nucleotide sequence encoding residues 1-32 of human FATP3 (UniProt Q8N163: MAALLLLPLLLLLPLLLLKLHLWPQLRWLPAD) was codon-optimized for *E. coli* expression, Synthesized de novo, and subcloned into the pMM-LR6 vector to generate the recombinant expression plasmid pMM-LR6-FATP3-TMD.

**Protein expression and isotopic labeling**

*E. coli* BL21(DE3) cells harbouring pMM-LR6-FATP3-TMD were grown overnight in LB medium (50 µg/mL kanamycin) at 37 ℃ and 220 rpm. The overnight culture was harvested (4 000 × g, 30 min, 4 ℃), resuspended in fresh LB to an initial OD600 of 0.1, and incubated at 37 ℃ until the OD600 reached 0.6-0.7. After a 20 min ice bath, expression was induced with 0.2 mM IPTG, and the culture was shifted to 20 ℃ for 16 hours with shaking at 220 rpm. Cells were collected by centrifugation (4 000 × g, 30 min, 4 ℃), flash-frozen in liquid nitrogen, and stored at -80 ℃. Uniformly 15N labeled FATP3-TMD was produced under identical conditions in M9 minimal medium supplemented with 15NH4Cl (1 g/L) as the sole nitrogen source.

**Protein purification**

Bacterial pellets were resuspended in lysis buffer (100 mM Tris-HCl, 200 mM NaCl, pH 8.0), disrupted by sonication on ice (250 W, 1.5 s on / 1.5 s off, total 5 min). Soluble fractions were removed by centrifugation (24 000 × g30 min, 4 ℃), and the inclusion-body pellet was retained.

The pellet was was solubilized in 6 M guanidine-HCl, 50 mM Tris-HCl, 200 mM NaCl, 1 % (v/v) Triton X-100, pH 8.0. Insoluble material was removed by a second centrifugation step (24 000 × g, 30 min, 4 ℃).

The supernatant was incubated with Ni-NTA resin for 1 hour at room temperature. The mixture was transferred to a gravity column, washed sequentially with 10 column volumes (CV) of 8 M urea and 10 CV of ddH2O. and the bound fusion protein was eluted with 3 CV of 90 % (v/v) formic acid, followed by a 0.5 CV water chase.

Cyanogen bromide (CNBr) was added to the eluate to a final concentration of 0.2 g/mL. Cleavage was carried out for 1 hour in the dark under a nitrogen atmosphere. The reaction mixture was transferred to 2 kDa MWCO dialysis tubing and dialyzed twice against ultrapure water (1 hour each), then lyophilized.

The dried material was dissolved in 50% (v/v) formic acid, , filtered through a 0.45 μm membrane, then purified by RP-HPLC on a C3 column (Agilent, ZORBAX) using an isopropanol/acetonitrile/water gradient containing 0.1 % trifluoroacetic acid. Fractions containing the target FATP3-TMD were pooled, lyophilised, and stored at -20 ℃.

**Mass spectrometry**

The molecular weight of the purified FATP3-TMD was confirmed by matrix-assisted laser desorption/ionisation time-of-flight (MALDI-TOF) mass spectrometry.

**Reconstitution**

Micelles: 15 mg of Fos-Choline-14 was dissolved in 1 ml of 6 M guanidine in NMR buffer (25 mM MES, pH 6.7). ~ 1 mg of Lyophilized FATP3-TMD was added and gently mixed until fully dissolved. The solution was transferred to a (2 KDa MWCO dialysis cassette (Thermo Scientific) and dialyzed against detergent-free NMR buffer to allow micelle formation and refolding. The dialysate was concentrated to 300 μl using a 10 kDa MWCO by centrifugation at 1 000 g, and supplemented with 20 μl of D2O.

Bicelles: 10 mg DMPC, 20 mg D6PC, and 1 mg of protein sample were co-dissolved in hexafluoroisopropanol. The solvent was evaporated under gentle nitrogen stream, and the mixture was further dried under vacuum for at least 2 hours. The residue was rehydrated in 500 μl of 6 M guanidine in NMR buffer (25 mM MES, pH 6.7), and dialyzed as above to remove denaturant and allow bicelle assembly. After dialysis, the sample was clarified, concentrated to 300 µl, supplemented with 20 µl of D2O, and transferred to a Shigemi tube for NMR measurements.

Determine the exact bicelle *q* of the sample by recording a 1H NMR spectrum. Quantify the relative amounts of DMPC and DH6PC (~0.85 and ~0.90 p.p.m., respectively) as the ratio of the integral of their NMR signals. If needed, adjust the *q* value to the desired value. For example, when the bicelle q is less than 0.5, it means that the DH6PC content in the sample is too high. Calculate the amount of DHPC present in the sample based on the actual q and the amount of fat used in the experiment. Calculate the DHPC required to achieve q=0.5. Dilute the sample with the NMR buffer (pH 6.7) required to remove excess detergent, knowing that the free [DHPC] in the solution is ~5 mM. Re-measure the "H NMR spectrum" to determine the accurate binuclear molecular weight of the sample.

**NMR titration experiment**

15N-1H heteronuclear single-quantum coherence (HSQC) spectra were recorded at 35 ℃ on Bruker Avance 600- and 800-MHz spectrometers equipped with cryogenically cooled probes. HSQC data set was acquired with 2048 complex points in the 1H dimension and 160 complex points in the 15N dimension. DHA, dissolved in the same NMR buffer, was stepwise titrated into the FATP3-TMD sample. HSQC spectra were recorded at after each DHA addition.
